# Supplementary material for: IL-18R-mediated HSC quiescence and MLKL-dependent cell death limit hematopoiesis during infection-induced shock
Source: PubMed Central journal article supplement — Stem Cell Reports. 2021 Nov 18;16(12):2887–99. doi: 10.1016/j.stemcr.2021.10.011 (PMC8693653; doi:10.1016/j.stemcr.2021.10.011), 2021-11-18
Supplement: mmc1.pdf [file mmc1.pdf]

**Stem Cell Reports, Volume 16**

**Supplemental Information**

**IL-18R-mediated HSC quiescence  
and MLKL-dependent cell death limit  
hematopoiesis during infection-induced shock**

**Jennifer E. Howard, Julianne N.P. Smith, Gabrielle Fredman, and Katherine C. MacNamara**

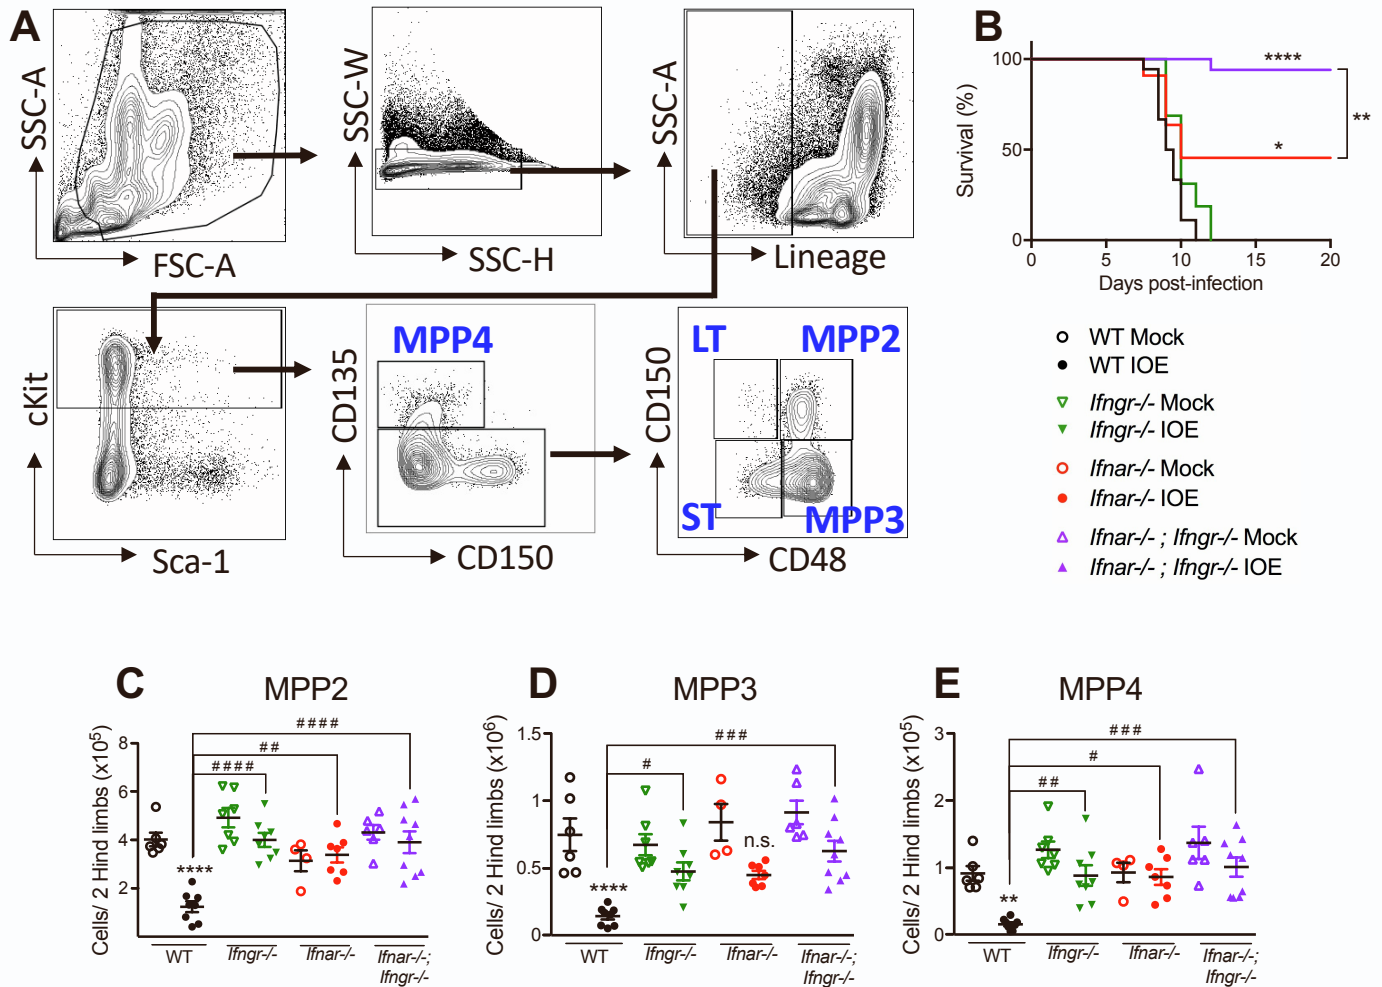

**Suppl. Figure 1. (See figure 1)** (A) Gating strategy used to identify HSPCs, LT HSCs, ST HSCs, and multipotent progenitor cells MPP2-4. (B) Mice infected with  $10^5$  copies of IOE were followed for 20 days. Data represent the survival curves of WT (n=18), *Ifnar*<sup>-/-</sup> (n=12), *Ifngr*<sup>-/-</sup> (n=16), and *Ifnar*<sup>-/-</sup>; *Ifngr*<sup>-/-</sup> mice (n=17). (C-E) Absolute cellularity of MPP2 (CD135<sup>+</sup> CD150<sup>+</sup> CD48<sup>+</sup>), MPP3 (CD135<sup>-</sup> CD150<sup>-</sup> CD48<sup>+</sup>), and MPP4s (CD135<sup>+</sup> CD150<sup>-</sup>) in WT, *Ifngr*<sup>-/-</sup>, *Ifnar*<sup>-/-</sup>, and *Ifnar*<sup>-/-</sup>; *Ifngr*<sup>-/-</sup> mice, n=4-9 mice.

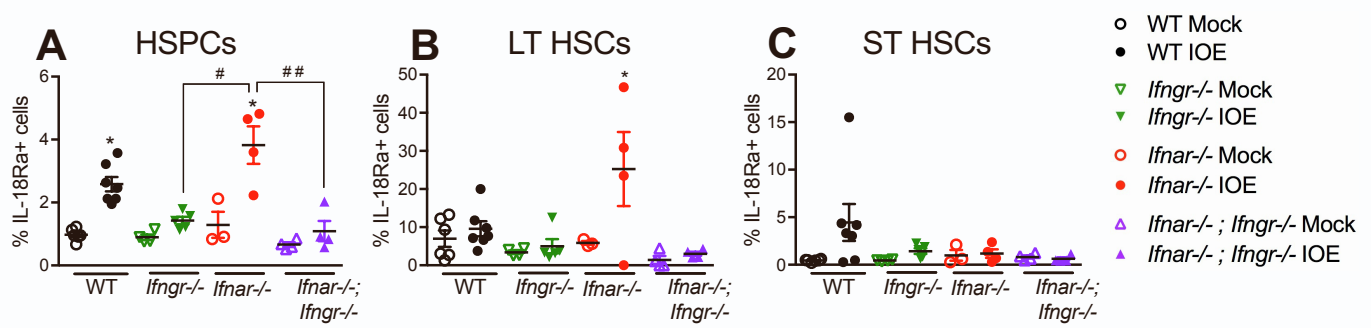

**Suppl. Figure 2.** (See figure 2) WT, *Ifngr*<sup>-/-</sup>, *Ifnar*<sup>-/-</sup>, and *Ifnar*<sup>-/-</sup>; *Ifngr*<sup>-/-</sup> mice were infected with 10<sup>5</sup> copies of IOE and BM was analyzed at 7dpi. (A) Expression of IL-18R $\alpha$  (alpha chain) on HSPCs was determined by flow cytometric staining. The percent of IL-18R $\alpha$  + cells is shown for (B) LT HSCs and (C) ST HSCs in mock- and IOE-infected mice day 7 post-infection; n=3-7 samples/group.

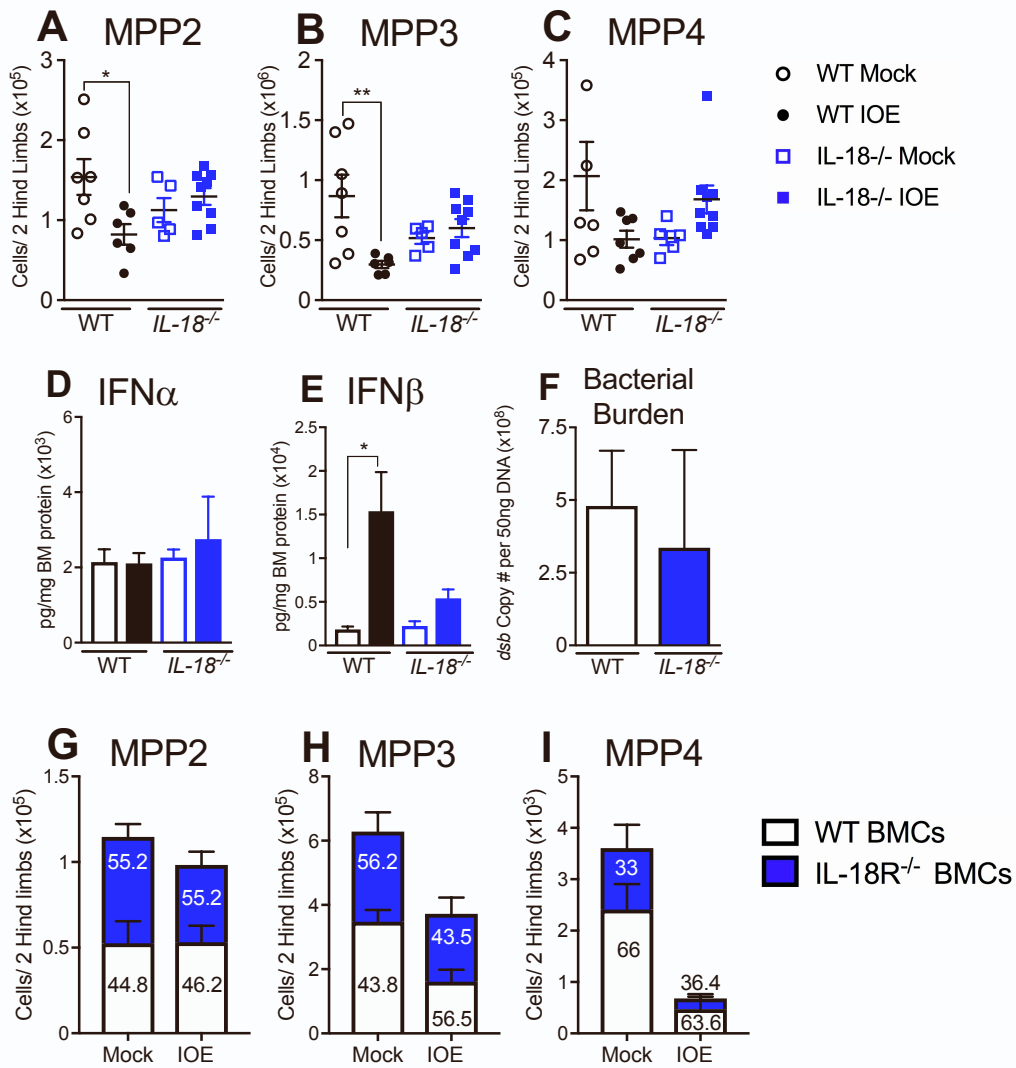

**Suppl. Figure 3.** (See figure 4 and 6) WT mice and IL-18-deficient mice were inoculated with 10<sup>5</sup> copies of IOE and BM was analyzed at 7dpi. (A) Absolute cellularity of MPP2, (B) MPP3, and (C) MPP4s. (D-E) BM protein concentrations of IFNα and IFNβ. (F) Bacterial burden from homogenized spleen of IOE infected mice, measured by qPCR for the IOE gene *dsb*. \**P*<0.05, \*\**P*<0.001, \*\*\**P*<0.0001.

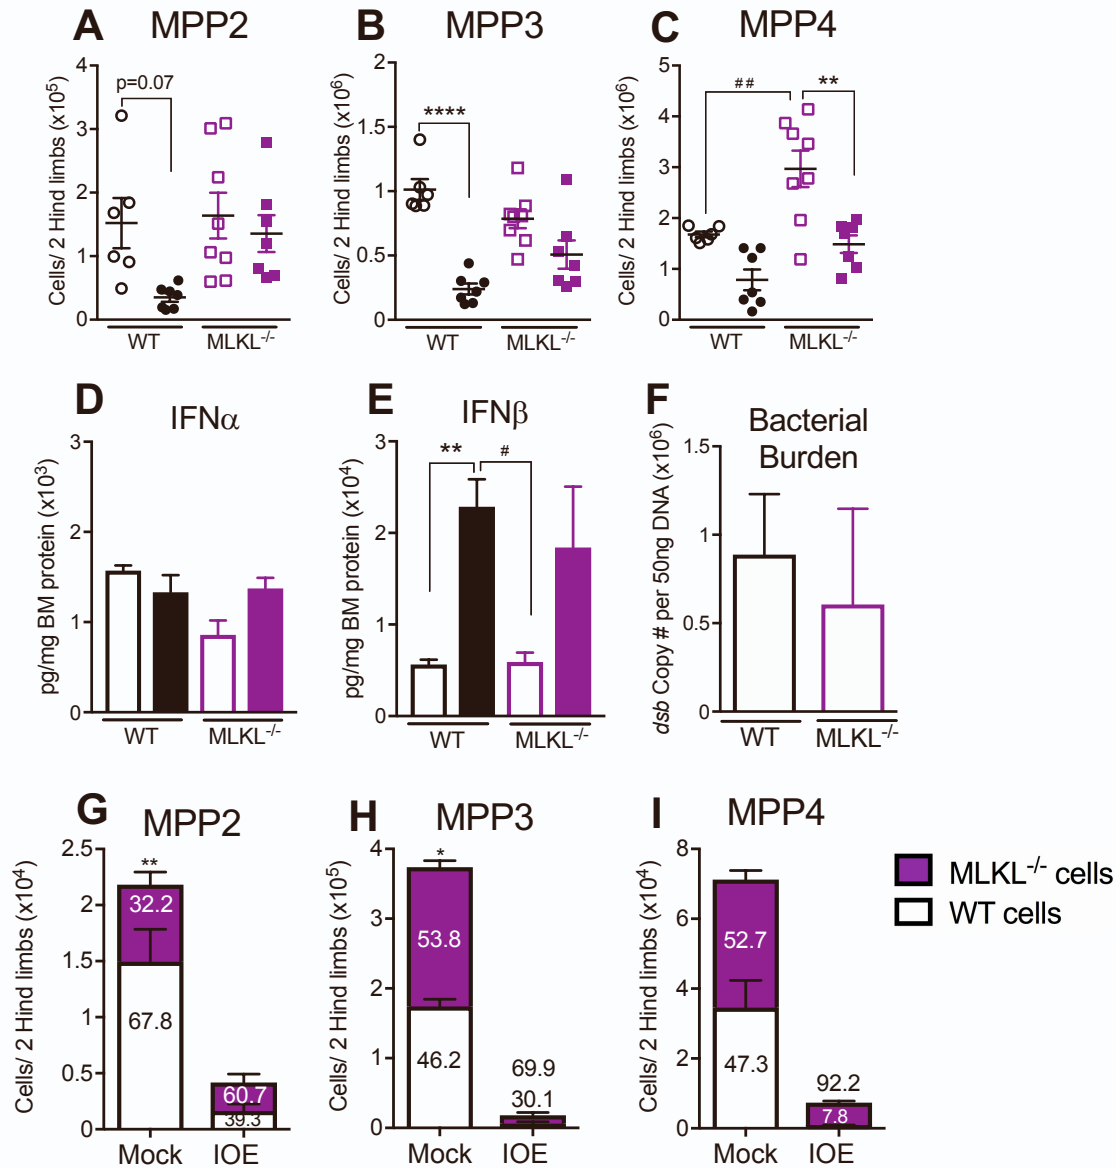

**Suppl Figure 4. (See figure 7)** WT and *Mkl1*<sup>-/-</sup> mice were inoculated with  $10^5$  copies of IOE and BM was analyzed at 7dpi. (A) Absolute cellularity of MPP2, (B) MPP3, and (C) MPP4s. (D-E) BM protein concentrations of IFN $\alpha$  and IFN $\beta$ . (F) Bacterial burden from homogenized spleen of IOE infected mice, measured by qPCR for the IOE gene *dsb*. (G-I) The absolute cellularity of MPP2, MPP3, and MPP4s of either WT or *Mkl1*<sup>-/-</sup> donor origin in the BM of WT recipients, overlaid with percentages of each genotype, n=4-8 mice/group. \* $P < 0.05$ , \*\* $P < 0.001$ .

Suppl. Table 1

| Molecule        | Flour       | Clone             | Vendor              |
|-----------------|-------------|-------------------|---------------------|
| 7-AAD           |             | Cat #: 420404     | BioLegend           |
| Annexin V       | PB          | Cat #: 640918     | BioLegend           |
| CD135           | PE          | AF210             | BioLegend           |
| CD135           | PE Cy5      | AF210             | BioLegend           |
| CD150           | BV711       | TC15-12F12.2      | BioLegend           |
| CD150           | PE Cy7      | TC15-12F12.2      | BioLegend           |
| CD45.1          | PE          | A20               | BioLegend           |
| CD45.1          | PB          | A20               | BioLegend           |
| CD45.2          | BV711       | 104               | BioLegend           |
| CD48            | FITC        | HM48-1            | BioLegend           |
| CD48            | APC         | HM48-1            | BioLegend           |
| CD48            | FITC        | HM48-1            | BioLegend           |
| cKit            | PerCP Cy5.5 | 2B8               | BioLegend           |
| cKit            | PB          | 2B8               | BioLegend           |
| DAPI            |             | CAS #: 28718-90-3 | Krackler Scientific |
| IL-18R $\alpha$ | PE          | P3TUNYA           | eBioscience         |
| Ki67            | FITC        | 16-A8             | BioLegend           |
| Ki67            | PE          | 16-A8             | BioLegend           |
| Sca-1           | PE Cy7      | D7                | BioLegend           |
| Lineage:        |             |                   |                     |
| CD11b           | FITC        | M1/70             | BioLegend           |
| CD11b           | Biotin      | M1/70             | BioLegend           |
| Gr-1            | FITC        | RB6-8C5           | BioLegend           |
| Gr-1            | Biotin      | RB6-8C5           | Invitrogen          |
| Ter119          | FITC        | TER-119           | BioLegend           |
| Ter119          | Biotin      | TER-119           | Invitrogen          |
| B220            | FITC        | R3A-6B2           | BioLegend           |
| B220            | Biotin      | RA3-6B2           | Invitrogen          |
| CD3e            | FITC        | 17A2              | BioLegend           |
| CD3e            | Biotin      | 145-2C11          | Invitrogen          |
| Streptavidin    | APC Cy7     | 405208            | BioLegend           |
